# Supplementary material for: Perceptions of Australia’s e-cigarette regulations and recommendations for future reforms: a qualitative study of adolescents and adults
Source: HighWire-hosted journal article supplement (doi:10.1136/bmjopen-2023-081032), 2024-02-01
Supplement: bmjopen-2023-081032supp001_data_supplement.pdf [file bmjopen-2023-081032supp001_data_supplement.pdf]

Supplementary Material

Table S1. Coding Hierarchy

| Parent code                               | Child code #1                                                         | Child code #2         | Child code #3                                                                        |
|-------------------------------------------|-----------------------------------------------------------------------|-----------------------|--------------------------------------------------------------------------------------|
| Perspectives on current regulations       | Perspectives on the prescription model                                | Positive sentiment    | Should reduce use among young people and those who have never smoked                 |
|                                           |                                                                       | Negative sentiment    | E-cigarettes are not a viable quitting aid                                           |
|                                           |                                                                       |                       | Barriers to access vs. the system is easy to manipulate                              |
|                                           |                                                                       |                       | Illusion of product safety                                                           |
|                                           | Perspectives on the availability of non-nicotine e-cigarette products | Positive sentiment    | Libertarian views – adults should be allowed to choose what they consume             |
|                                           |                                                                       |                       | Non-nicotine products as potential quitting aids                                     |
|                                           |                                                                       | Negative sentiment    | Safety and addiction concerns                                                        |
|                                           |                                                                       |                       | Nicotine content concerns                                                            |
|                                           |                                                                       |                       | Gateway to nicotine use                                                              |
|                                           |                                                                       |                       | Difficult to enforce differential regulations for nicotine and non-nicotine products |
| Recommendations for potential regulations | Demand factors                                                        | Product and packaging | Health warnings on product packaging                                                 |

|  |                |                                                  |                                                                 |
|--|----------------|--------------------------------------------------|-----------------------------------------------------------------|
|  |                |                                                  | Plain packaging                                                 |
|  |                |                                                  | Remove flavours                                                 |
|  |                |                                                  | Provide detailed information about the contents of e-cigarettes |
|  |                | Increase price of e-cigarettes                   | -                                                               |
|  |                | Increase the number of vape-free areas           | -                                                               |
|  |                | Limit advertising                                | Reduce visibility                                               |
|  |                |                                                  | Stop appealing to children/young people                         |
|  | Supply factors | Ban e-cigarettes                                 | Ban importation of all e-cigarettes                             |
|  |                |                                                  | Ban disposable e-cigarettes                                     |
|  |                | Make e-cigarettes less available to children     | -                                                               |
|  |                | Legalise access to e-cigarettes for adults       | -                                                               |
|  | Miscellaneous  | Increase support for mental health and addiction | -                                                               |
|  |                | Enforce regulations                              | -                                                               |
